# Supplementary material
Source: MDPI journal article supplement (https://www.mdpi.com/2071-1050/15/18/13467)
Supplement: s1 [file s1]

Table S1. Number of reads and alpha diversity indices of sea cucumbers (*H. polii*, HP and *H. tubulosa*, HT) under different processing situations (Raw-R, Boiled-B, Frozen-F, Final Product-FP and salted Final Product-FPS).

| Sample | Raw reads | Filtered/denoised/non-chimeric reads | Observed Features | Shannon |
|--------|-----------|--------------------------------------|-------------------|---------|
| HP.F   | 40,156    | 21,592                               | 161               | 4.66    |
| HT.F   | 42,250    | 22,208                               | 50                | 3       |
| HP.FP  | 40,229    | 21,413                               | 77                | 4.31    |
| HT.FP  | 40,346    | 18,919                               | 339               | 6.65    |
| HP.B   | 42,637    | 23,999                               | 57                | 2.56    |
| HT.B   | 45,056    | 17,312                               | 71                | 3.87    |
| HP.SFP | 47,375    | 22,249                               | 447               | 6.85    |
| HT.SFP | 47,232    | 23,538                               | 375               | 6.83    |
| HP.R   | 36,131    | 16,032                               | 76                | 4.57    |
| HT.R   | 43,393    | 19,791                               | 57                | 3.94    |

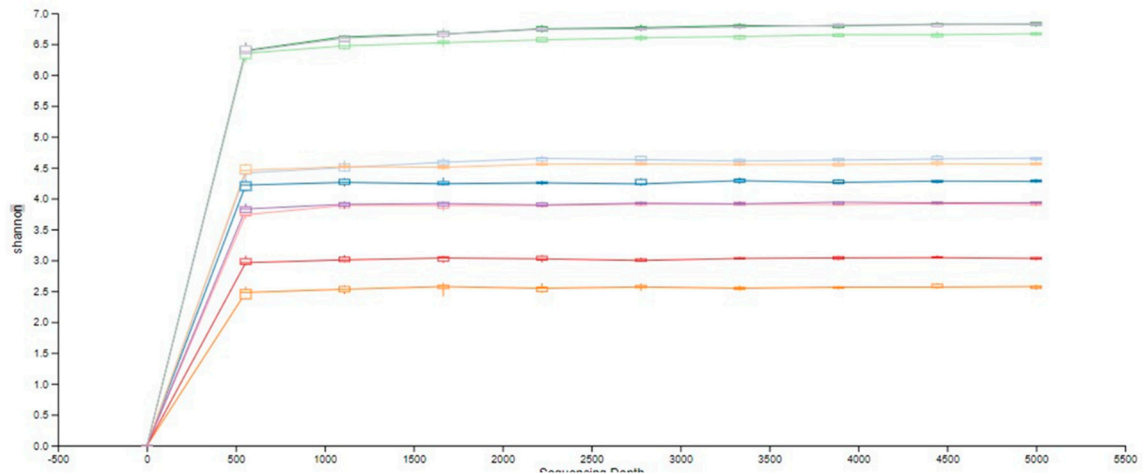

Figure S1. Shannon-Wiener rarefaction curves of sea cucumbers (*H. polii*, HP and *H. tubulosa*, HT) under different processing situations (Raw-R, Boiled-B, Frozen-F, Final Product-FP and salted Final Product-SFP).

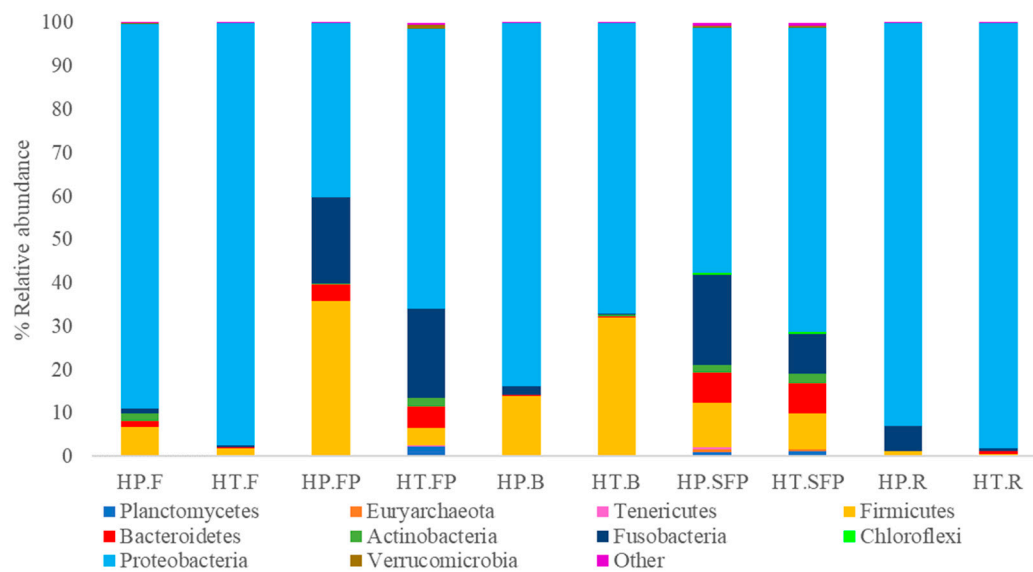

Figure S2. Relative abundance (%) of bacterial phyla of sea cucumbers (*H. polii*, HP and *H. tubulosa*, HT) under different processing situations (Raw-R, Boiled-B, Frozen-F, Dehydrated Final Product-FP and Salted Final Product-SFP), as revealed by 16S rRNA metabarcoding analysis.

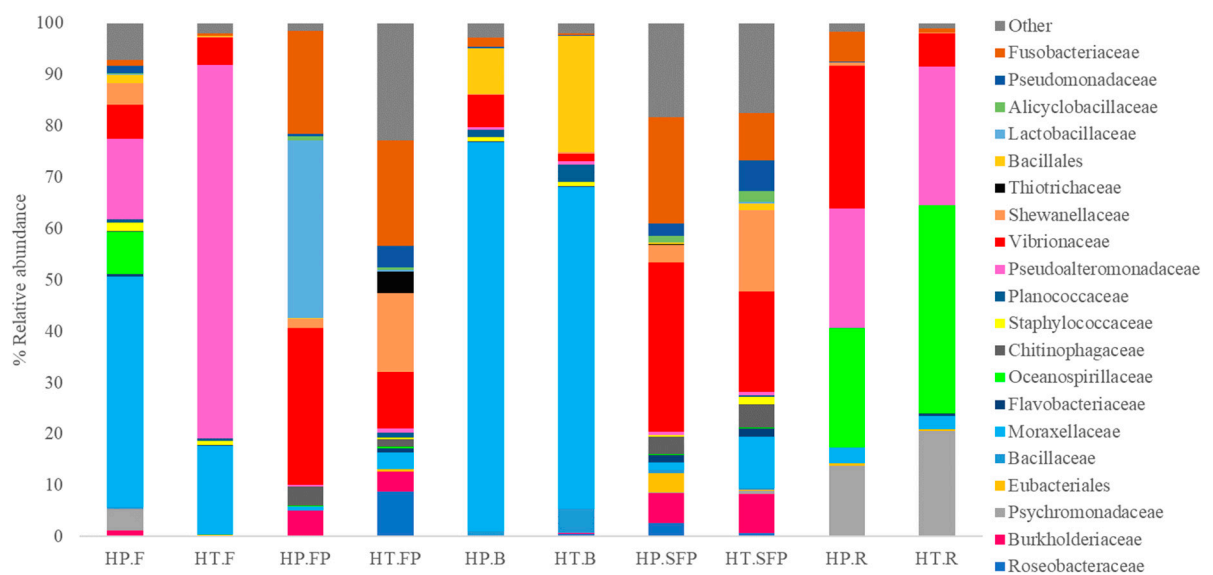

Figure S3. Relative abundance (%) of bacterial families of sea cucumbers (*H. polii*, HP and *H. tubulosa*, HT) under different processing situations (Raw-R, Boiled-B, Frozen-F, Dehydrated Final Product-FP and Salted Final Product-SFP), as revealed by 16S rRNA metabarcoding analysis.
